# Supplementary material for: Determinants of Pesticide Exposure in Occupational Studies: A Meta-Analysis
Source: MDPI journal article supplement (doi:10.3390/toxics11070623), 2023-07-18
Supplement: s1 [file s1]

Supplementary information

# Determinants of Pesticide Exposure in Occupational Studies: A Meta-Analysis

Christelle Oltramare<sup>1</sup>, Zakia Mediouni<sup>1</sup>, Yara Shoman<sup>1</sup>, Nancy B. Hopf<sup>1</sup>, Halshka Graczyk<sup>2</sup>, Aurélie Berthet<sup>1,\*</sup>

<sup>1</sup> Center for Primary Care and Public Health (Unisanté), Department of occupational and environmental health (DSTE), University of Lausanne, CH-1066 Epalinges-Lausanne, Switzerland

<sup>2</sup> International Labour Organization (ILO), 1211 Geneva, Switzerland

\* Correspondence: aurelie.berthet@unisanté.ch

## Text S1: String research keywords

The search keywords were “pesticid\* OR fungicid\* OR insecticid\* OR herbicid\*”; “agricultural exposure\* OR “agricultural health” OR agricultural work\* OR vineyard\*”; “occupational diseases OR occupational exposure OR occupational medicine OR occupational risk OR (industry AND mortality) OR occupational group\* OR work-related OR working environment”; “cohort OR “case study” OR “cross sectional” “.

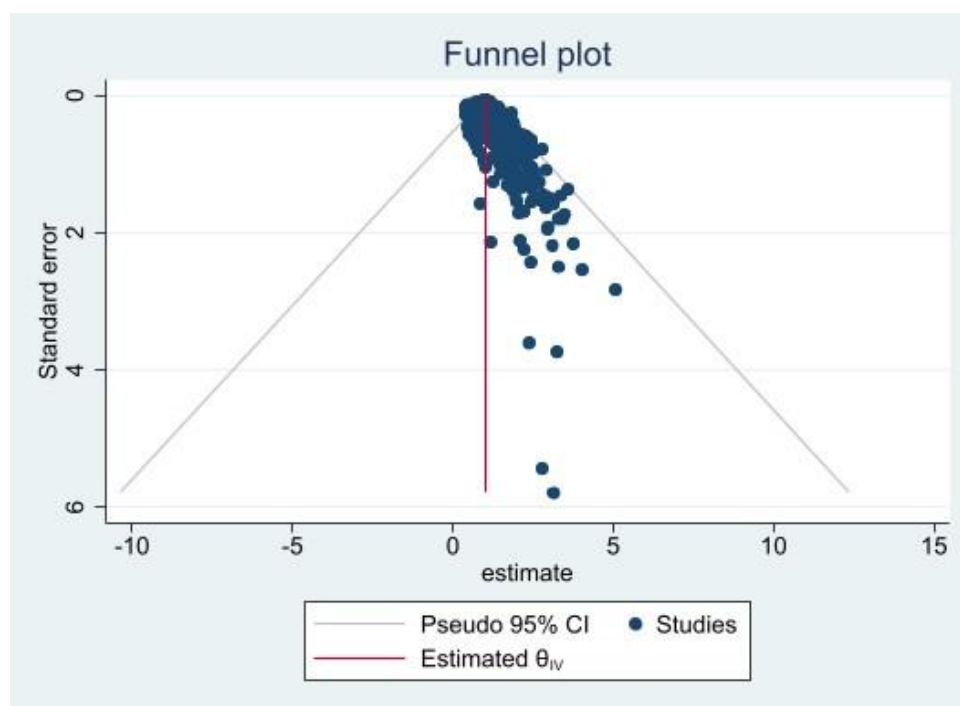

**Figure S1.** Funnel plot on association between *active ingredient* and *cancer* for the evaluation of the publication bias.

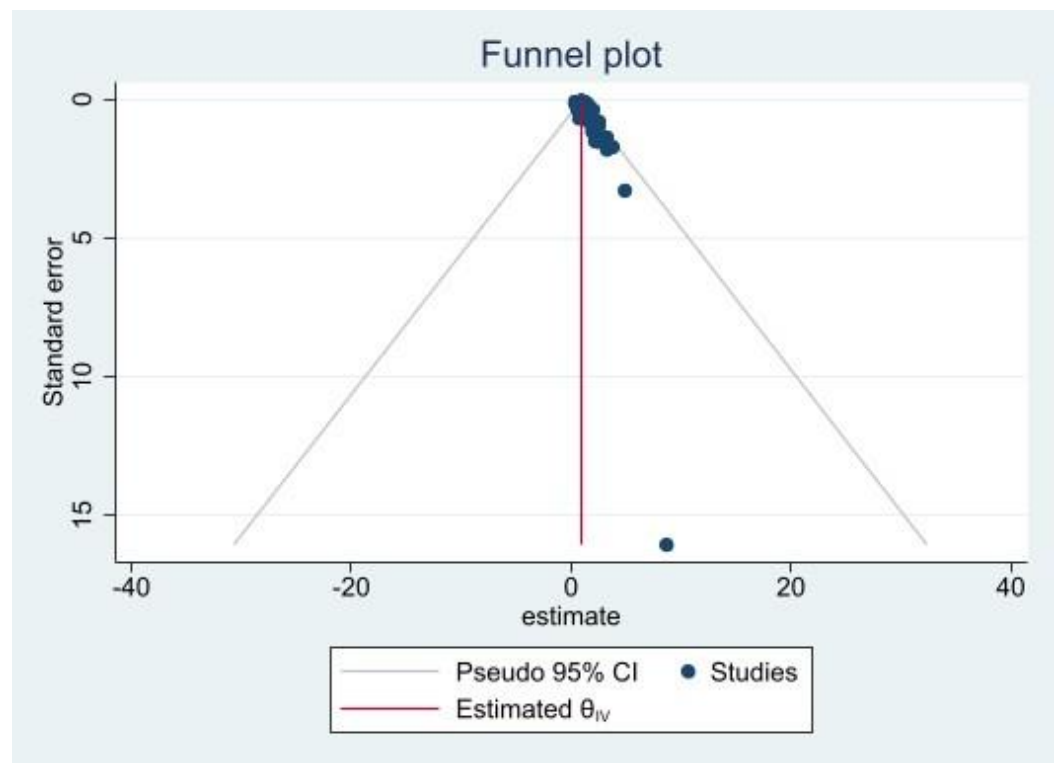

**Figure S2.** Funnel plot on association between *lifetime exposure days* and *cancer* for the evaluation of the publication bias.

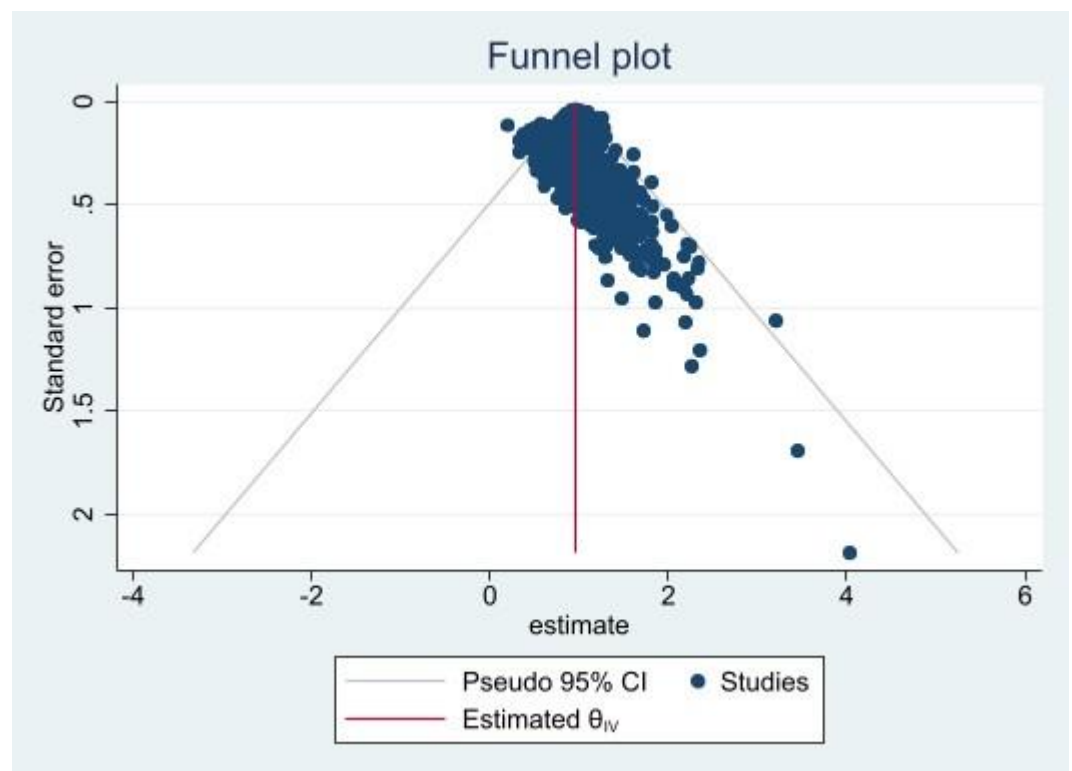

**Figure S3.** Funnel plot on association between *Intensity-weighted exposure days* and *cancer* for the evaluation of the publication bias.

**Table S1.** 71 Articles included in the meta-analysis with additional data extracted.

| Authors              | Title                                                                                           | Publication year | Study design | Health outcome type | Health outcome assessment type     | Study location (country) | Crop type | Study period | Study population (N)                                                                       | Active substances                                                                                                                                                                                                                                                                                                                                                                                                                                                                                                                                                                                                                                                                                                                                                                                        |
|----------------------|-------------------------------------------------------------------------------------------------|------------------|--------------|---------------------|------------------------------------|--------------------------|-----------|--------------|--------------------------------------------------------------------------------------------|----------------------------------------------------------------------------------------------------------------------------------------------------------------------------------------------------------------------------------------------------------------------------------------------------------------------------------------------------------------------------------------------------------------------------------------------------------------------------------------------------------------------------------------------------------------------------------------------------------------------------------------------------------------------------------------------------------------------------------------------------------------------------------------------------------|
| Alavanja et al. [69] | Use of agricultural pesticides and prostate cancer risk in the Agricultural Health Study cohort | 2003             | Cohort (AHS) | Cancer              | Population-based cancer registries | USA                      | ND        | 1993-1999    | 55,332 male pesticide applicators (private and commercial) (556 incident prostate cancers) | <p>50 active ingredients analyzed:</p> <p><u>Herbicides:</u> Alachlor, Atrazine, Butylate, Chlorimuron-ethyl, Cyanazine, Dicamba, 2,4-D, EPTC, Glyphosate, Imazethypyr, Metolachlor, Metribuzin, Paraquat, Pendimethalin, Petroleum oil as herbicide, 2,4,5-T, 2,4,5-TP, Trifluralin</p> <p><u>Insecticides:</u> Aldicarb, Aldrin, Carbofuran, Carbaryl, Chlordane, Chlorpyrifos, Coumaphos, Dichlorvos, Diazinon, Dieldrin, DDT, Fonofos, Heptachlor, Lindane, Malathion, Parathion, Permethrin (for crops), Permethrin (for animals), Phorate, Terbufos, Toxaphene, Trichlorofon</p> <p><u>Fungicides:</u> Benomyl, Captan, Chlorothalonil, Maneb/macozeb, Metalaxyl, Ziram</p> <p><u>Fumigants:</u> Aluminum phosphide, Ethylene dibromide, Carbon tetrachloride/carbon disulfide, Methyl bromide</p> |
| Alavanja et al. [70] | Pesticides and lung cancer risk in the Agricultural Health Study cohort                         | 2004             | Cohort (AHS) | Cancer              | Population-based cancer registries | USA                      | ND        | 1993-2001    | 57,284 pesticide applicators and 32,333 spouses of farmer applicators (240 lung            | <p><u>Herbicides:</u> Benzoic acid (Dicamba), Chlo-roacetanilide (Metolachlor), Dinitroaniline (Pendimethalin)</p> <p><u>Insecticides:</u> Carbamate (Carbofuran), Phosphorothioate (Chlorpyrifos, Diazinon), Chlorinated organic (Dieldrin)</p>                                                                                                                                                                                                                                                                                                                                                                                                                                                                                                                                                         |

|                       |                                                                                                        |      |              |        |                                                               |     |    |           |                                                                                                  |                                                                                                                                                                                                                                                                                                                                                                                                                                                                                                                                                                                                                              |
|-----------------------|--------------------------------------------------------------------------------------------------------|------|--------------|--------|---------------------------------------------------------------|-----|----|-----------|--------------------------------------------------------------------------------------------------|------------------------------------------------------------------------------------------------------------------------------------------------------------------------------------------------------------------------------------------------------------------------------------------------------------------------------------------------------------------------------------------------------------------------------------------------------------------------------------------------------------------------------------------------------------------------------------------------------------------------------|
|                       |                                                                                                        |      |              |        |                                                               |     |    |           | cancer cases in applicators and 60 in spouses)                                                   |                                                                                                                                                                                                                                                                                                                                                                                                                                                                                                                                                                                                                              |
| Alavanja et al. [71]  | Non-Hodgkin Lymphoma risk and insecticide, fungicide and fumigant use in the Agricultural Health Study | 2014 | Cohort (AHS) | Cancer | Cancer registry files in Iowa and North Carolina              | USA | ND | 1993-2011 | 54,306 pesticide applicators (523 incident Non-hodgkin lymphomas)                                | <p>26 active substances:</p> <p><u>Insecticides:</u> Carbamate (Aldicarb, Carbaryl, Carbofuran), Organochlorine (Aldrin, Chlordane, DDT, Dieldrin, Heptachlor, Lindane, Toxaphene), Oganophosphate (Chlorpyrifos, Coumaphos, Dichlorvos, Diazinon, Fonofos, Malathion, Parathion, Phorate, Terbufos), Pyrethroid (Permethrin crops and animals)</p> <p><u>Fungicides:</u> Acylalanine (Metalaxyl), Carbamate (Benomyl), Dithiocarbamate (Maneb/macozeb), Phthalimide (Captan), Polychlorinated aromatic thalonitrile (Chlorothalonil)</p> <p><u>Fumigants:</u> Methyl halide (Methyl bromide)</p>                            |
| Andreotti et al. [72] | Agricultural pesticide use and pancreatic cancer risk in the Agricultural Health Study cohort          | 2009 | Cohort (AHS) | Cancer | Population-based cancer registries of Iowa and North Carolina | USA | ND | 1993-2004 | 82,503 participants (52,721 pesticide applicators and 29,782 spouses) (93 incident cancer cases) | <p>48 active ingredients:</p> <p><u>Herbicides:</u> Benzoic (Dicamba), Chloroacetanilide (Alachlor, Metolachlor), Dinitroaniline (Pendimethalin, Trifluralin), Imidazolinone (Imazethypyr), Phenoxy (2,4-D, 2,4,5-T, 2,4,5-TP), Phosphinic (Glyphosate), Thiocarbamate (Butylate, EPTC), Triazine (Atrazine, Cyanazine, Metribuzin), Urea (Chlorimuron-ethyl), other herbicides (Paraquat, Petroleum oil)</p> <p><u>Insecticides:</u> Carbamate (Carbaryl, Carbofuran), Organochlorine (Aldrin, Chlordane, DDT, Lindane, Heptachlor, Toxaphene), Oganophosphate (Chlorpyrifos, Coumaphos, Dichlorvos, Diazinon, Fonofos,</p> |

|                       |                                                                                              |      |              |        |                                                  |     |    |           |                                                                                          |                                                                                                                                                                                                                                                                                                                                                                                                                                                                                                                                                                                                                                                                                                                                                                      |
|-----------------------|----------------------------------------------------------------------------------------------|------|--------------|--------|--------------------------------------------------|-----|----|-----------|------------------------------------------------------------------------------------------|----------------------------------------------------------------------------------------------------------------------------------------------------------------------------------------------------------------------------------------------------------------------------------------------------------------------------------------------------------------------------------------------------------------------------------------------------------------------------------------------------------------------------------------------------------------------------------------------------------------------------------------------------------------------------------------------------------------------------------------------------------------------|
|                       |                                                                                              |      |              |        |                                                  |     |    |           |                                                                                          | <p>Malathion, Parathion, Phorate, Terbufos, Trichlorofon), Pyrethroid (Permethrin crops and animals)</p> <p><u>Fungicides:</u> Benomyl, Captan, Chlorothalonil, Maneb/macozeb, Metalaxyl, Ziram</p> <p><u>Fumigants:</u> Aluminum phosphide, Ethylene dibromide, Carbon tetrachloride, Methyl bromide</p>                                                                                                                                                                                                                                                                                                                                                                                                                                                            |
| Andreotti et al. [73] | Glyphosate use and cancer incidence in the Agricultural Health Study                         | 2018 | Cohort (AHS) | Cancer | Cancer registry files in Iowa and North Carolina | USA | ND | 1993-2013 | 54,251 pesticide applicators (44,932 reported using Glyphosate) (5,779 incident cancers) | <p>Glyphosate and 2,4-D, Alachlor, Atrazine, Metolachlor, Trifluralin, Lindane, DDT, Diazinon, Terbufos, Permethrin</p>                                                                                                                                                                                                                                                                                                                                                                                                                                                                                                                                                                                                                                              |
| Andreotti et al. [16] | Occupational pesticide use and risk of renal cell carcinoma in the Agricultural Health Study | 2020 | Cohort (AHS) | Cancer | Cancer registry files in Iowa and North Carolina | USA | ND | 1993-2015 | 55,873 pesticide applicators (308 incident renal cell carcinomas)                        | <p>37 active substances:</p> <p><u>Herbicides:</u> Anilides/anilines (Alachlor, Metolachlor, Pendimethalin, Trifluralin), Benzoic (Dicamba), Imidazolinone (Imazethypyr), Phenoxy (2,4-D, 2,4,5-T), Phosphinic (Glyphosate), Thiocarbamate (Butylate, EPTC), Triazine/triazinone (Atrazine, Cyanazine, Metribuzin), Urea (Chlorimuron ethyl), others (Paraquat, Petroleum oil)</p> <p><u>Insecticides:</u> Carbamate (Carbaryl, Carbofuran), Organochlorines (Aldrin, Chlordane, DDT, Heptachlor, Lindane, Toxaphene), Organophosphate (Chlorpyrifos, Diazinon, Dichlorvos, Fonofos, Malathion, Phorate, Terbufos), Pyrethroid (Permethrin crops and animals)</p> <p><u>Fungicides:</u> Captan, Chlorothalonil, Metalaxyl</p> <p><u>Fumigant:</u> Methyl bromide</p> |

|                           |                                                                                                               |      |                    |        |                                                              |        |                                                 |           |                                                                                                                                     |                                                                                                                                                                                                                                               |
|---------------------------|---------------------------------------------------------------------------------------------------------------|------|--------------------|--------|--------------------------------------------------------------|--------|-------------------------------------------------|-----------|-------------------------------------------------------------------------------------------------------------------------------------|-----------------------------------------------------------------------------------------------------------------------------------------------------------------------------------------------------------------------------------------------|
| Band et al. [74]          | Prostate cancer risk and exposure to pesticides in British Columbia farmers                                   | 2011 | Case-control study | Cancer | British Columbia Cancer Registry                             | Canada | 45 animal and crop commodities                  | 1983-1990 | 1,516 prostate cancers (113 farmers) and 4,994 controls (316 farmers) (all other cancer sites except lung and unknown primary site) | Assessment made for 290 different chemical agents, including 180 pesticides (see Table II for the list of active ingredients): 68 insecticides, 39 fungicides, 53 herbicides 50 others (fumigants, rodenticides, and plant growth regulators) |
| Barry et al. [75]         | Methyl bromide exposure and cancer risk in the Agricultural Health Study                                      | 2012 | Cohort (AHS)       | Cancer | Cancer registry files in Iowa and North Carolina             | USA    | ND                                              | 1993-2007 | 53,588 pesticide applicators (7,814 reported using Methyl bromide) (2,960 incident cancer cases)                                    | Methyl bromide and Metalaxyl, Ethylene dibromide, Carbaryl, Aldicarb, Maneb/mancozeb                                                                                                                                                          |
| Beane Freeman et al. [76] | Cancer incidence among male pesticide applicators in the Agricultural Health Study cohort exposed to Diazinon | 2005 | Cohort (AHS)       | Cancer | Cancer registry files in Iowa and North Carolina             | USA    | ND                                              | 1993-2002 | 23,106 male applicators (301 incident cancer cases)                                                                                 | Diazinon                                                                                                                                                                                                                                      |
| Bonner et al. [77]        | Malathion exposure and the incidence of cancer in the Agricultural Health Study                               | 2007 | Cohort (AHS)       | Cancer | Population-based tumor registries of Iowa and North Carolina | USA    | Only analysis of Alfalfa and cotton productions | 1993-2002 | 19,717 pesticides applicators using malathion                                                                                       | Malathion and Carbaryl, Parathion, Diazinon, Chlordane, Lindane                                                                                                                                                                               |

|                       |                                                                                                                       |      |                  |        |                                                  |        |                                          |           |                                                                                             |                                                                                                                                                                                                                                                                                                                                                  |
|-----------------------|-----------------------------------------------------------------------------------------------------------------------|------|------------------|--------|--------------------------------------------------|--------|------------------------------------------|-----------|---------------------------------------------------------------------------------------------|--------------------------------------------------------------------------------------------------------------------------------------------------------------------------------------------------------------------------------------------------------------------------------------------------------------------------------------------------|
| Bonner et al. [78]    | Occupational exposure to Terbufos and the incidence of cancer in the Agricultural Health Study                        | 2010 | Cohort (AHS)     | Cancer | Cancer registry files in Iowa and North Carolina | USA    | Only analysis of Corn production         | 1993-2005 | 57,310 pesticide applicators (16,489 reported using Terbufos) (2,960 incident cancer cases) | Terbufos and Carbofuran, Fonofos, Atrazine, 2,4-D, Phorate                                                                                                                                                                                                                                                                                       |
| Bonner et al. [79]    | Occupational exposure to pesticides and the incidence of lung cancer in the Agricultural Health Study                 | 2017 | Cohort (AHS)     | Cancer | Cancer registry files in Iowa and North Carolina | USA    | ND                                       | 1993-2011 | 57,310 pesticide applicators (654 incident lung cancers)                                    | <u>Herbicides</u> : Benzoic (Dicamba), Dinitroaniline (Pendimethalin), Pyrimidylsulfonyleurea (Chlorimuron-ethyl)<br><u>Insecticides</u> : Carbamate (Carbaryl, Carbofuran), Organochlorine (Chlordane, DDT, Dieldrin, Heptachlor), Organophosphate (Chlorpyrifos, Malathion, Parathion)<br><u>Fungicides</u> : Dithiocarbamate (Maneb/macrozeb) |
| Boulanger et al. [62] | Agricultural exposure and risk of bladder cancer in the AGRiculture and CANcer cohort                                 | 2017 | Cohort (AGRICAN) | Cancer | Cancer registries                                | France | 13 types of crops + 5 types of livestock | 2005-2009 | 148,051 women and men farm owners and workers (179 incident bladder cancers)                | Arsenic                                                                                                                                                                                                                                                                                                                                          |
| Boulanger et al. [80] | Lung cancer risk and occupational exposures in crop farming: results from the AGRiculture and CANcer (AGRICAN) cohort | 2018 | Cohort (AGRICAN) | Cancer | Cancer registries                                | France | 13 types of crops + 5 types of livestock | 2005-2013 | 148,044 women and men active and retired in agriculture-related activities (897 incident    | ND                                                                                                                                                                                                                                                                                                                                               |

|                         |                                                                                                       |      |                    |        |                                                                                               |     |                              |           |                                                                                                                               |                                                                                                                                                                                                                                                                                                      |
|-------------------------|-------------------------------------------------------------------------------------------------------|------|--------------------|--------|-----------------------------------------------------------------------------------------------|-----|------------------------------|-----------|-------------------------------------------------------------------------------------------------------------------------------|------------------------------------------------------------------------------------------------------------------------------------------------------------------------------------------------------------------------------------------------------------------------------------------------------|
|                         |                                                                                                       |      |                    |        |                                                                                               |     |                              |           | cases of lung cancers)                                                                                                        |                                                                                                                                                                                                                                                                                                      |
| Chiu et al. [81]        | Agricultural pesticide use and risk of t(14;18)-defined subtypes of non-Hodgkin lymphoma              | 2006 | Case-control study | Cancer | Pathology review and histology for cases from the Nebraska Lymphoma Study Group and hospitals | USA | ND                           | 1983-1986 | 172 non-Hodgkin lymphoma cases (65 t(14;18)-positive and 107 t(14;18)-negative) and 1,432 controls (no hematopoietic cancers) | <u>Insecticides</u> : Organochlorines, Carbamates, Organophosphates, Pyrethroids (only family groups no details on active substances)<br><u>Herbicides</u> : Phenoxyacetic acids, Triazines, Amides, Benzoic acids, Carbamates, Dinitroanilines (only family groups no details on active substances) |
| Christensen et al. [82] | Coumaphos exposure and incident cancer among male participants in the Agricultural Health Study (AHS) | 2010 | Cohort (AHS)       | Cancer | Cancer registry files in Iowa and North Carolina                                              | USA | Only analysis of Cattle farm | 1993-2005 | 47,822 male pesticide applicators (3,689 reported using Coumaphos) (2,960 incident cancer cases)                              | Coumaphos                                                                                                                                                                                                                                                                                            |
| De Roos et al. [83]     | Cancer incidence among Glyphosate-exposed pesticide applicators in the Agricultural Health Study      | 2005 | Cohort (AHS)       | Cancer | Cancer registry files in Iowa and North Carolina                                              | USA | ND                           | 1993-2001 | 52,656 pesticide applicators (private and commercial) (52,207 males and 1,449 females)                                        | Glyphosate and 2,4-D, Alachlor, Atrazine, Metolachlor, Trifluralin, Carbaryl, Benomyl, Maneb, Paraquat, Diazinon                                                                                                                                                                                     |
| Delancey et al. [84]    | Occupational exposure to Metribuzin and the incidence of cancer in the                                | 2009 | Cohort (AHS)       | Cancer | Population-based cancer registries of Iowa and                                                | USA | ND                           | 1993-2004 | 23,072 pesticide applicators (8,504                                                                                           | Metribuzin and Cyanazine, Chlorimuron ethyl, Pendimethalin, Butylate, Trifluralin                                                                                                                                                                                                                    |

|                    | Agricultural Health Study                                                                      |      |              |        | North Carolina                                   |     |    |           | reported using Metribuzin) (554 incident cancer cases)                                   |                                                                                                                                                                                                                                                                                                                                                                                                                                                                                                                                                                                                                                                                                                                                                                                        |
|--------------------|------------------------------------------------------------------------------------------------|------|--------------|--------|--------------------------------------------------|-----|----|-----------|------------------------------------------------------------------------------------------|----------------------------------------------------------------------------------------------------------------------------------------------------------------------------------------------------------------------------------------------------------------------------------------------------------------------------------------------------------------------------------------------------------------------------------------------------------------------------------------------------------------------------------------------------------------------------------------------------------------------------------------------------------------------------------------------------------------------------------------------------------------------------------------|
| Dennis et al. [85] | Pesticide use and cutaneous melanoma in pesticide applicators in the Agricultural Health Study | 2010 | Cohort (AHS) | Cancer | Cancer registry files in Iowa and North Carolina | USA | ND | 1993-2005 | 24,704 pesticide applicators (150 incident melanomas)                                    | <p>50 active ingredients:</p> <p><u>Herbicides:</u> Alachlor, Atrazine, Butylate, Chlorimuron-ethyl, Cyanazine, Dicamba, 2,4-D, EPTC, Glyphosate, Imazethypyr, Metolachlor, Metribuzin, Paraquat, Pendi-methalin, Petroleum oil, 2,4,5-T, 2,4,5-TP, Trifluralin</p> <p><u>Insecticides:</u> Aldicarb, Aldrin, Carbaryl, Carbofuran, Chlordane, Chlorpyrifos, Cou-maphos, DDT, Diazinon, Dichlorvos, Dieldrin, Fonofos, Heptachlor, Lindane, Malathion, Parathion, Permethrin (for crops), Permethrin (for animals), Phorate, Terbufos, Toxaphene, Trichlorofon</p> <p><u>Fungicides:</u> Benomyl, Captan, Chlorothalo-nil, Maneb/macozeb, Metalaxyl, Ziram</p> <p><u>Fumigants:</u> Aluminum phosphide, Ethylene dibromide, Carbon tetrachloride/car-bon disulfide, Methyl bromide</p> |
| Engel et al. [86]  | Pesticide use and breast cancer risk among farmers' wives in the Agricultural Health Study     | 2005 | Cohort (AHS) | Cancer | Population-based cancer registries               | USA | ND | 1993-2000 | 30,454 women (wives of private pesticide applicators) (309 incident breast cancer cases) | <p>47 active ingredients:</p> <p><u>Herbicides:</u> Alachlor, Atrazine, Butylate, Chlorimuron-ethyl, Cyanazine, Dicamba, EPTC, Glyphosate, Imazethypyr, Metolachlor, Metribuzin, Paraquat, Pendi-methalin, Petroleum oil, Trifluralin, 2,4-D, 2,4,5-T, 2,4,5-TP</p> <p><u>Insecticides:</u> Aldicarb, Aldrin, Carbaryl, Carbofuran, Chlordane, Chlorpyrifos, Coumaphos, Dichlorvos, Diazinon, Dieldrin, DDT, Fonofos, Heptachlor, Lindane,</p>                                                                                                                                                                                                                                                                                                                                         |

|                       |                                                                                                            |      |              |                                |                                                                    |     |                                 |           |                                      |                                                                                                                                                                                                                                                                                                                                                                                                                                                                                                                                                                                                                                                                                                                                                                                                                                                                                                                                                                        |
|-----------------------|------------------------------------------------------------------------------------------------------------|------|--------------|--------------------------------|--------------------------------------------------------------------|-----|---------------------------------|-----------|--------------------------------------|------------------------------------------------------------------------------------------------------------------------------------------------------------------------------------------------------------------------------------------------------------------------------------------------------------------------------------------------------------------------------------------------------------------------------------------------------------------------------------------------------------------------------------------------------------------------------------------------------------------------------------------------------------------------------------------------------------------------------------------------------------------------------------------------------------------------------------------------------------------------------------------------------------------------------------------------------------------------|
|                       |                                                                                                            |      |              |                                |                                                                    |     |                                 |           |                                      | <p>Malathion, Parathion, Permethrin (for crops), Permethrin (for animals), Phorate, Terbufos, Toxaphene</p> <p><u>Fungicides:</u> Benomyl, Captan, Chlorothalonil, Maneb, Metalaxyl</p> <p><u>Fumigants:</u> Ethylene dibromide, Carbon tetrachloride/carbon disulfide, Methyl bromide</p>                                                                                                                                                                                                                                                                                                                                                                                                                                                                                                                                                                                                                                                                             |
| Goldner et al. [87]   | Hypothyroidism and pesticide use among male private pesticide applicators in the agricultural health study | 2013 | Cohort (AHS) | Endocrine disruption (Thyroid) | Self-reported questionnaire and telephone interviews for follow-up | USA | ND                              | 1993-2010 | 22,246 male applicators              | <p>50 active ingredients:</p> <p><u>Herbicides:</u> Benzoic (Dicamba), Chloroacetanilide (Alachlor, Metolachlor), Dinitroaniline (Pendimethalin, Trifluralin), Imidazolinone (Imazethypyr), Phenoxy (2,4-D, 2,4,5-T, 2,4,5-TP), Phosphinic (Glyphosate), Thiocarbamate (Butylate, EPTC), Triazine (Atrazine, Cyanazine, Metribuzin), Urea (Chlorimuron-ethyl), other herbicides (Paraquat, Petroleum oil)</p> <p><u>Insecticides:</u> Carbamate (Aldicarb, Carbaryl, Carbofuran), Organochlorine (Aldrin, Chlordane, Dieldrin, DDT, Lindane, Heptachlor, Toxaphene), Organophosphate (Chlorpyrifos, Coumaphos, Diazinon, Dichlorvos, Fonofos, Malathion, Parathion, Phorate, Terbufos, Trichlorphon), Pyrethroid (Permethrin crops and animals)</p> <p><u>Fungicides:</u> Benomyl, Captan, Chlorothalonil, Maneb/Mancozeb, Metalaxyl, Ziram</p> <p><u>Fumigants:</u> Aluminum phosphide, Ethylene dibromide, Carbon disulfide/Carbon tetrachloride, Methyl bromide</p> |
| Greenburg et al. [88] | Cancer incidence among pesticide applicators exposed to Captan in                                          | 2008 | Cohort (AHS) | Cancer                         | Cancer registry files in Iowa and                                  | USA | Only analysis of Field corn and | 1993-2004 | 48,986 pesticide applicators (4,383) | Captan                                                                                                                                                                                                                                                                                                                                                                                                                                                                                                                                                                                                                                                                                                                                                                                                                                                                                                                                                                 |

|                     |                                                                                                                       |      |              |        |                                                  |     |                     |           |                                                                                                                                                       |                                                                                                                                                                                                                                                                                                                                                                                                                                                                                                                                                                                                                                                                                                                                    |
|---------------------|-----------------------------------------------------------------------------------------------------------------------|------|--------------|--------|--------------------------------------------------|-----|---------------------|-----------|-------------------------------------------------------------------------------------------------------------------------------------------------------|------------------------------------------------------------------------------------------------------------------------------------------------------------------------------------------------------------------------------------------------------------------------------------------------------------------------------------------------------------------------------------------------------------------------------------------------------------------------------------------------------------------------------------------------------------------------------------------------------------------------------------------------------------------------------------------------------------------------------------|
|                     | the Agricultural Health Study                                                                                         |      |              |        | North Carolina                                   |     | Soybean productions |           | reported using Captan)                                                                                                                                |                                                                                                                                                                                                                                                                                                                                                                                                                                                                                                                                                                                                                                                                                                                                    |
| Hofmann et al. [89] | Lifetime pesticide use and monoclonal gammopathy of undetermined significance in a prospective cohort of male farmers | 2021 | Cohort (AHS) | Cancer | Biomonitoring (MGUS assessment)                  | USA | ND                  | 1993-2010 | 1,638 male farmers                                                                                                                                    | 36 pesticides (16 insecticides, 17 herbicides, 2 fungicides, 1 fumigant):<br><u>Insecticides</u> : Organochlorine insecticides (Aldrin, Aldrin/dieldrin combined, Chlordane, DDT, Heptachlor, Lindane), Organophosphate insecticides (Chlorpyrifos, Coumaphos, Diazinon, Dichlorvos, Fonofos, Malathion, Phorate, Terbufos), Carbamate insecticides (Carbaryl, Carbofuran), Pyrethroid insecticides (Permethrin)<br><u>Herbicides</u> : 2,4-D, 2,4,5-T, Alachlor, Atrazine, Butylate, Chlorimuron ethyl, Cyanazine, Dicamba, EPTC, Glyphosate, Imazethapyr, Metolachlor, Metribuzin, Paraquat, Pendimethalin, Petroleum oil/distillates, Trifluralin<br><u>Fungicides</u> : Captan, Metalaxyl<br><u>Fumigants</u> : Methyl bromide |
| Hou et al. [90]     | Pendimethalin exposure and cancer incidence among pesticide applicators                                               | 2006 | Cohort (AHS) | Cancer | Cancer registry files in Iowa and North Carolina | USA | ND                  | 1993-2002 | 57,311 pesticide applicators and 32,347 spouses of private applicators (9,089 pendimethalin-exposed and 15,285 non-pendimethalin-exposed applicators) | Pendimethalin and Ziram, Dieldrin, Butylate, Chlorimuron-ethyl, Metribuzin                                                                                                                                                                                                                                                                                                                                                                                                                                                                                                                                                                                                                                                         |

|                     |                                                                                                                                                                  |      |                    |               |                                                            |     |                                              |           |                                                                                                        |                                                                                                                                                          |
|---------------------|------------------------------------------------------------------------------------------------------------------------------------------------------------------|------|--------------------|---------------|------------------------------------------------------------|-----|----------------------------------------------|-----------|--------------------------------------------------------------------------------------------------------|----------------------------------------------------------------------------------------------------------------------------------------------------------|
| Ji et al. [91]      | Occupational exposure to pesticides and pancreatic cancer                                                                                                        | 2001 | Case-control study | Cancer        | Cancer registries (cases diagnosed by tissue confirmation) | USA | ND                                           | 1986-1989 | 485 pancreatic cancer cases and 2,109 controls (general population)                                    | Only the three main categories (i.e., insecticides, fungicides, and herbicides), without details on active ingredients, were used in exposure assessment |
| Jones et al. [92]   | Incidence of solid tumours among pesticide applicators exposed to the organophosphate insecticide diazinon in the Agricultural Health Study: an updated analysis | 2015 | Cohort (AHS)       | Cancer        | Cancer registry files in Iowa and North Carolina           | USA | Only analysis of livestock and poultry farms | 1993-2011 | 22,830 male pesticide applicators (5,120 reported using Methyl bromide) (2,288 incident solid tumours) | Diazinon and Chlorpyrifos, Dicamba, Dieldrin, Metolachlor, Pendimethalin, Carbofuran, Terbufos                                                           |
| Kamel et al. [93]   | Neurologic symptoms in licensed pesticide applicators in the Agricultural Health Study                                                                           | 2007 | Cohort (AHS)       | Neurotoxicity | Self-reported questionnaire                                | USA | ND                                           | 1993-1997 | 18,782 male applicators                                                                                | Insecticides (Organophosphates, organochlorines, carbamates, pyrethroids) Fumigants                                                                      |
| Kang et al. [94]    | Cancer incidence among pesticide applicators exposed to Trifluralin in the Agricultural Health Study                                                             | 2008 | Cohort (AHS)       | Cancer        | Cancer registry files in Iowa and North Carolina           | USA | ND                                           | 1993-2002 | 50,127 pesticide applicators (25,712 reported using Trifluralin)                                       | Trifluralin and Dicamba, Metolachlor, Imazethayr, Metribuzin, Cyanazine                                                                                  |
| Koutros et al. [95] | Dichlorvos exposure and human cancer risk: Results from the Agricultural Health Study                                                                            | 2008 | Cohort (AHS)       | Cancer        | Cancer registry files in Iowa and North Carolina           | USA | ND                                           | 1993-2004 | 57,311 pesticide applicators (4,613 reported using DDVP)                                               | Dichlorvos (DDVP)                                                                                                                                        |
| Koutros et al. [96] | Aromatic amine pesticide use and                                                                                                                                 | 2009 | Cohort (AHS)       | Cancer        | Cancer registry files in                                   | USA | ND                                           | 1993-2004 | 49,398 pesticide                                                                                       | Imazethapyr and Permethrin (crops), Fonofos, Trichlorfon, Carbofuran, Glyphosate,                                                                        |

|                     |                                                                                                   |      |              |        |                                                  |     |                                  |           |                                                                               |                                                                                                                                                                                                                                                                                                                                                                                                                                                                             |
|---------------------|---------------------------------------------------------------------------------------------------|------|--------------|--------|--------------------------------------------------|-----|----------------------------------|-----------|-------------------------------------------------------------------------------|-----------------------------------------------------------------------------------------------------------------------------------------------------------------------------------------------------------------------------------------------------------------------------------------------------------------------------------------------------------------------------------------------------------------------------------------------------------------------------|
|                     | human cancer risk: results from the U.S. Agricultural Health Study                                |      |              |        | Iowa and North Carolina                          |     |                                  |           | applicators (20,646 reported using Imazethapyr) (2,907 incident cancer cases) | Metolachlor, EPTC, Alachlor, Pendimethalin, and Trifluralin                                                                                                                                                                                                                                                                                                                                                                                                                 |
| Koutros et al. [97] | Risk of total and aggressive Prostate Cancer and pesticide use in the Agricultural Health Study   | 2013 | Cohort (AHS) | Cancer | Cancer registry files in Iowa and North Carolina | USA | ND                               | 1993-2007 | 54,412 pesticide applicators (1,962 incident prostate cancers)                | 18 active substances:<br><u>Insecticides</u> : Organochlorine (Aldrin, Chlordane, DDT, Dieldrin, Lindane, Heptachlor, Toxaphene), Organophosphate (Chlorpyrifos, Coumaphos, Dichlorvos, Diazinon, Fonofos, Malathion, Parathion, Phorate, Terbufos)<br><u>Herbicides</u> : Triazine (Atrazine, Cyanazine)                                                                                                                                                                   |
| Koutros et al. [98] | Occupational exposure to pesticides and bladder cancer risk                                       | 2016 | Cohort (AHS) | Cancer | Cancer registry files in Iowa and North Carolina | USA | ND                               | 1993-2011 | 57,310 pesticide applicators (321 incident bladder cancers)                   | 36 active ingredients:<br><u>Herbicides</u> : 2,4,5-T, 2,4-D, Alachlor, Atrazine, Butylate, Chlorimuron-ethyl, Cyanazine, Dicamba, EPTC, Glyphosate, Imazethapyr, Metolachlor, Metribuzin, Paraquat, Pendimethalin, Petroleum oil, Trifluralin<br><u>Insecticides</u> : Aldicarb, Aldrin, Carbaryl, Carbofuran, Chlordane, Chlorpyrifos, Coumaphos, Diazinon, DDT, Dichlorvos, Fonofos, Heptachlor, Lindane, Malathion, Parathion, Permethrin, Phorate, Terbufos, Toxaphene |
| Lee et al. [99]     | Cancer incidence among pesticide applicators exposed to alachlor in the Agricultural Health Study | 2004 | Cohort (AHS) | Cancer | Cancer registry files in Iowa and North Carolina | USA | Only analysis of Corn production | 1993-2000 | 49,980 pesticide applicators (1,466 incident malignant neoplasms)             | Alachlor and Atrazine, Cyanazine, Metolachlor, Trifluralin, 2,4-D                                                                                                                                                                                                                                                                                                                                                                                                           |

|                         |                                                                                                       |      |                  |        |                                                               |        |                                                         |           |                                                                                                    |                                                                                                                                                                                                                                                                                                                                                                                                                                                                                                                                                                                                                                                                                                                                                                                                    |
|-------------------------|-------------------------------------------------------------------------------------------------------|------|------------------|--------|---------------------------------------------------------------|--------|---------------------------------------------------------|-----------|----------------------------------------------------------------------------------------------------|----------------------------------------------------------------------------------------------------------------------------------------------------------------------------------------------------------------------------------------------------------------------------------------------------------------------------------------------------------------------------------------------------------------------------------------------------------------------------------------------------------------------------------------------------------------------------------------------------------------------------------------------------------------------------------------------------------------------------------------------------------------------------------------------------|
| Lee et al. [100]        | Cancer incidence among pesticide applicators exposed to Chlorpyrifos in the Agricultural Health Study | 2004 | Cohort (AHS)     | Cancer | Cancer registry files in Iowa and North Carolina              | USA    | ND                                                      | 1993-2001 | 54,383 pesticide applicators (52,910 males and 1,473 females) (2,070 incident malignant neoplasms) | Chlorpyrifos and Alachlor, Carbofuran, Fonofos, Trifluralin                                                                                                                                                                                                                                                                                                                                                                                                                                                                                                                                                                                                                                                                                                                                        |
| Lee et al. [101]        | Pesticide use and colorectal cancer risk in the Agricultural Health Study                             | 2007 | Cohort (AHS)     | Cancer | Population-based cancer registries of Iowa and North Carolina | USA    | ND                                                      | 1993-2002 | 56,813 pesticide applicators (305 incident colorectal cancers)                                     | <p>50 active ingredients:</p> <p><u>Herbicides</u>: Alachlor, Atrazine, Butylate, Chlorimuron-ethyl, Cyanazine, Dicamba, 2,4-D, EPTC, Glyphosate, Imazethypyr, Metolachlor, Metribuzin, Paraquat, Pendimethalin, Petroleum oil/distillate, 2,4,5-T, 2,4,5-TP, Trifluralin</p> <p><u>Insecticides</u>: Aldicarb, Aldrin, Carbaryl, Carbofuran, Chlordane, Chlorpyrifos, Coumaphos, DDT, Diazinon, Dichlorvos/DDVP, Dieldrin, Fonofos, Heptachlor, Lindane, Malathion, Parathion, Permethrin (for crops), Permethrin (for animals), Phorate, Terbufos, Toxaphene, Trichlorofon</p> <p><u>Fungicides</u>: Benomyl, Captan, Chlorothalonil, Maneb/macozeb, Metalaxyl, Ziram</p> <p><u>Fumigants</u>: Aluminum phosphide, Ethylene dibromide, Carbon tetrachloride/carbon disulfide, Methyl bromide</p> |
| Lemarchand et al. [102] | Prostate cancer risk among French farmers in the AGRICAN cohort                                       | 2016 | Cohort (AGRICAN) | Cancer | Cancer registries                                             | France | 13 types of crops (Wheat and/or Barley, Vineyard, Corn, | 2005-2009 | 81,961 men active and retired in agriculture-related activities                                    | ND                                                                                                                                                                                                                                                                                                                                                                                                                                                                                                                                                                                                                                                                                                                                                                                                 |

|                    |                                                                                        |      |              |        |                                                  |     |                                                                                                                                                                     |           |                                                                                              |                                                                                                                                                                                                                                         |
|--------------------|----------------------------------------------------------------------------------------|------|--------------|--------|--------------------------------------------------|-----|---------------------------------------------------------------------------------------------------------------------------------------------------------------------|-----------|----------------------------------------------------------------------------------------------|-----------------------------------------------------------------------------------------------------------------------------------------------------------------------------------------------------------------------------------------|
|                    |                                                                                        |      |              |        |                                                  |     | Potato, Beet, Fruits, Tobacco, Field-grown vegetable, Rape, Sunflower, Peas, Greenhouse) + 5 types of livestock (Cattle, Poultry, Pigs, Horses, Sheep and/or goats) |           | (1496 incident prostate cancers)                                                             |                                                                                                                                                                                                                                         |
| Lerro et al. [103] | Use of Acetochlor and cancer incidence in the Agricultural Health Study                | 2015 | Cohort (AHS) | Cancer | Cancer registry files in Iowa and North Carolina | USA | ND                                                                                                                                                                  | 1993-2011 | 33,484 male pesticide applicators (4,026 reported using Acetochlor) (3,234 incident cancers) | Acetochlor and Imazethapyr, Dicamba, Atrazine, EPTC, Cyanazine, Pendimethalin, Trifluralin, Flumetsulam, Clopyralid, Isoxaflutole, Alachlor, Metolachlor, Atrazine, EPTC, 2,4-D, Butylate, Aldicarb, Chlordane, Chlorpyrifos, Toxaphene |
| Lerro et al. [104] | Dicamba use and cancer incidence in the Agricultural Health Study: an updated analysis | 2020 | Cohort (AHS) | Cancer | Cancer registry files in Iowa and North Carolina | USA | Only analysis of Beef cattle, hog, and poultry farms, field corn, cotton, wheat, and                                                                                | 1993-2015 | 49,922 pesticide applicators (26,412 reported using Dicamba) (5,779 incident cancers)        | Dicamba and Imazethapyr, 2,4-D, Trifluralin, Atrazine and Cyanazine.                                                                                                                                                                    |

|                    |                                                                                                              |      |              |                                |                                                  |     |                                                                                             |           |                                                                 |                                                                                                                                                                                                                                                                                                                                                                                                                                                                                                                                                                                                                                                                                                                                                                                                                                                             |
|--------------------|--------------------------------------------------------------------------------------------------------------|------|--------------|--------------------------------|--------------------------------------------------|-----|---------------------------------------------------------------------------------------------|-----------|-----------------------------------------------------------------|-------------------------------------------------------------------------------------------------------------------------------------------------------------------------------------------------------------------------------------------------------------------------------------------------------------------------------------------------------------------------------------------------------------------------------------------------------------------------------------------------------------------------------------------------------------------------------------------------------------------------------------------------------------------------------------------------------------------------------------------------------------------------------------------------------------------------------------------------------------|
|                    |                                                                                                              |      |              |                                |                                                  |     | soybean productions                                                                         |           |                                                                 |                                                                                                                                                                                                                                                                                                                                                                                                                                                                                                                                                                                                                                                                                                                                                                                                                                                             |
| Lerro et al. [105] | Pesticide exposure and incident thyroid cancer among male pesticide applicators in Agricultural Health Study | 2021 | Cohort (AHS) | Cancer                         | Cancer registry files in Iowa and North Carolina | USA | Only analysis of Cattle and hog farms, Alfalfa, Field corn, Soybean and Tobacco productions | 1993-2015 | 53,096 male pesticide applicators (85 incident thyroid cancers) | <p>44 active substances:</p> <p><u>Herbicides:</u> Chloroacetanilides (Alachlor, Metolachlor), Dinitroaniline (Pendimethalin, Trifluralin), Benzoic (Dicamba), Imidazolinone (Imazethypyr), Phenoxy (2,4-D, 2,4,5-T, 2,4,5-TP), Phosphinic (Glyphosate), Thiocarbamate (Butylate, EPTC), Triazine/triazinone (Atrazine, Cyanazine, Metribuzin), Urea (Chlorimuron ethyl), others (Paraquat, Petroleum oil)</p> <p><u>Insecticides:</u> Carbamate (Aldicarb, Carbaryl, Carbofuran), Organochlorines (Aldrin, Chlordane, DDT, Heptachlor, Lindane, Toxaphene), Organophosphate (Chlorpyrifos, Coumaphos, Diazinon, Dichlorvos, Fonofos, Malathion, Parathion, Phorate, Terbufos), Pyrethroid (Permethrin)</p> <p><u>Fungicides:</u> Benomyl, Captan, Chlorothalonil, Maneb/Mancozeb, Metalaxyl</p> <p><u>Fumigant:</u> Aluminum Phosphide, Methyl bromide</p> |
| Lerro et al. [106] | Occupational pesticide exposure and subclinical hypothyroidism among male pesticide applicators              | 2018 | Cohort (AHS) | Endocrine disruption (Thyroid) | Self-reported questionnaire and blood sampling   | USA | ND                                                                                          | 2010-2013 | 619 male applicators                                            | <p>30 active ingredients:</p> <p><u>Herbicides:</u> Benzoic (Dicamba), Chloroacetanilide (Alachlor, Metolachlor), Dinitroaniline (Pendimethalin, Trifluralin), Imidazolinone (Imazethypyr), Phenoxy (2,4-D, 2,4,5-T), Phosphinic (Glyphosate), Thiocarbamate (Butylate, EPTC), Triazine (Atrazine, Cyanazine, Metribuzin), Urea (Chlorimuron-ethyl), other herbicides (Petroleum distillates)</p> <p><u>Insecticides:</u> Carbamate (Carbaryl,</p>                                                                                                                                                                                                                                                                                                                                                                                                          |

|                      |                                                                                                         |      |              |        |                                                              |     |                                                                    |           |                                                                                            |                                                                                                                                                                                                                                                                                                |
|----------------------|---------------------------------------------------------------------------------------------------------|------|--------------|--------|--------------------------------------------------------------|-----|--------------------------------------------------------------------|-----------|--------------------------------------------------------------------------------------------|------------------------------------------------------------------------------------------------------------------------------------------------------------------------------------------------------------------------------------------------------------------------------------------------|
|                      |                                                                                                         |      |              |        |                                                              |     |                                                                    |           |                                                                                            | Carbofuran), Organochlorine (Aldrin, Chlordane, DDT, Heptachlor), Oganophosphate (Chlorpyrifos, Diazinon, Fonofos, Malathion, Phorate, Terbufos), Pyrethroid (Permethrin)<br><u>Fungicides</u> : Captan, Metalaxyl<br><u>Fumigants</u> : Carbon disulfide/Carbon tetrachloride, Methyl bromide |
| Lynch et al. [107]   | Cancer incidence among pesticide applicators exposed to Cyanazine in the Agricultural Health Study      | 2006 | Cohort (AHS) | Cancer | Cancer registry files in Iowa and North Carolina             | USA | Only analysis of Corn production                                   | 1993-2002 | 57,311 pesticide applicators (20,341 reported ever using Cyanazine)                        | Cyanazine and Metolachlor, EPTC, Alachlor, Imazethapyr, Trifluralin                                                                                                                                                                                                                            |
| Lynch et al. [108]   | Cancer incidence among pesticide applicators exposed to Butylate in the agricultural health study (AHS) | 2009 | Cohort (AHS) | Cancer | Cancer registry files in Iowa and North Carolina             | USA | ND                                                                 | 1993-2004 | 19,655 pesticide applicators (5,297 reported using Butylate) (2,907 incident cancer cases) | Butylate and Atrazine, Metribuzin, Chlorimuron-ethyl, Pendimethalin, Aldrin, Ziram                                                                                                                                                                                                             |
| Mahajan et al. [109] | Phorate exposure and incidence of cancer in the Agricultural Health Study                               | 2006 | Cohort (AHS) | Cancer | Population-based tumor registries of Iowa and North Carolina | USA | Only analysis of Corn production                                   | 1993-2002 | 52,395 private applicators (farmers) and 4,916 commercial applicators                      | Phorate and Aldicarb, Ethylene dibromide, Aldrin, 2,4,5-TP, Butylate                                                                                                                                                                                                                           |
| Mahajan et al. [110] | Fonofos exposure and cancer incidence in the Agricultural Health Study                                  | 2006 | Cohort (AHS) | Cancer | Population-based tumor registries of Iowa and North Carolina | USA | Only analysis of Corn production and of the number of livestock on | 1993-2002 | 45,372 pesticide applicators                                                               | Fonofos and Trichorfon, Carbofuran, Imazethapyr, EPTC                                                                                                                                                                                                                                          |

|                         |                                                                                    |      |                                      |                                |                                                              |     |                                                                                    |           |                                                                                                                                        |                                                                                                                                                                                           |
|-------------------------|------------------------------------------------------------------------------------|------|--------------------------------------|--------------------------------|--------------------------------------------------------------|-----|------------------------------------------------------------------------------------|-----------|----------------------------------------------------------------------------------------------------------------------------------------|-------------------------------------------------------------------------------------------------------------------------------------------------------------------------------------------|
|                         |                                                                                    |      |                                      |                                |                                                              |     | farm (other than poultry)                                                          |           |                                                                                                                                        |                                                                                                                                                                                           |
| Mahajan et al. [111]    | Carbaryl exposure and incident cancer in the Agricultural Health Study             | 2007 | Cohort (AHS)                         | Cancer                         | Population-based tumor registries of Iowa and North Carolina | USA | ND                                                                                 | 1993-2002 | 21,416 pesticides applicators (1,291 incident cancer cases)                                                                            | Carbaryl and Diazinon, Chlordane, Malathion, Dieldrin                                                                                                                                     |
| Mills and Yang [112]    | Prostate cancer risk in California farm workers                                    | 2003 | Case-control study from Cohort (UFW) | Cancer                         | California Cancer Registry                                   | USA | Grapes/Tree Fruit, Citrus fruit, Vegetables, Mushrooms, Strawberries, Horticulture | 1988-1999 | 222 prostate cancers in Hispanic male farm workers and 1,110 controls (cancer-free Hispanic male farm workers)                         | Chlorothalonil, Diazinon, Dichloropropene, Dichlorvos, Dicofof, Heptachlor, Lindane, Malathion, Mancozeb, Maneb, Methyl bromide, Propargite, Propoxur, Propyzamide, Simazine, Trifluralin |
| Mills et al. [113]      | Lymphohematopoietic cancers in the United Farm Workers of America (UFW), 1988–2001 | 2005 | Case-control study from Cohort (UFW) | Cancer                         | California Cancer Registry                                   | USA | Grapes, Citrus, Vegetables, Mushrooms, Strawberries, Horticulture                  | 1987-2001 | 139,000 farm workers (131 Lymphohematopoietic cancers in Hispanic workers (94 males; 37 females) and 655 controls in Hispanic farmers) | 2,4-D, Captan, Chlorothalonil, Diazinon, Dichloropropene, Malathion, Mancozeb, Maneb, Methyl bromide, Methyl parathion, Nitrofen, Propyzamide, Simazine, Toxaphene, Trifluralin           |
| Montgomery et al. [114] | Incident Diabetes and Pesticide Exposure among Licensed Pesticide                  | 2008 | Cohort (AHS)                         | Endocrine disruption (Diabete) | Self-reported questionnaire and telephone                    | USA | ND                                                                                 | 1993-2003 | 31,787 applicators (30,955 males and 832 females)                                                                                      | 50 active ingredients: <u>Herbicides</u> : Benzoic (Dicamba), Chloroacetanilide (Alachlor, Metolachlor), Dinitroaniline (Pendimethalin, Trifluralin),                                     |

|                        |                                                                                                                       |      |                    |               |                                                  |     |    |           |                                                                    |                                                                                                                                                                                                                                                                                                                                                                                                                                                                                                                                                                                                                                                                                                                                                                  |
|------------------------|-----------------------------------------------------------------------------------------------------------------------|------|--------------------|---------------|--------------------------------------------------|-----|----|-----------|--------------------------------------------------------------------|------------------------------------------------------------------------------------------------------------------------------------------------------------------------------------------------------------------------------------------------------------------------------------------------------------------------------------------------------------------------------------------------------------------------------------------------------------------------------------------------------------------------------------------------------------------------------------------------------------------------------------------------------------------------------------------------------------------------------------------------------------------|
|                        | Applicators: Agricultural Health Study 1993 – 2003                                                                    |      |                    |               | interviews for follow-up                         |     |    |           |                                                                    | Imidazolinone (Imazethypyr), Phenoxy (2,4-D, 2,4,5-T, 2,4,5-TP), Phosphinic (Glyphosate), Thiocarbamate (Butylate, EPTC), Triazine (Atrazine, Cyanazine, Metribuzin), Urea (Chlorimuron-ethyl), other herbicides (Paraquat, Petroleum oil)<br><u>Insecticides</u> : Carbamate (Aldicarb, Carbaryl, Carbofuran), Organochlorine (Aldrin, Chlordane, DDT, Dieldrin, Heptachlor, Lindane, Toxaphene), Organophosphate (Chlorpyrifos, Coumaphos, Diazinon, Dichlorvos, Fonofos, Malathion, Parathion, Phorate, Terbufos, Trichlorphon), Pyrethroid (Permethrin crops and animals)<br><u>Fungicides</u> : Benomyl, Captan, Chlorothalonil, Maneb, Metalaxyl, Ziram<br><u>Fumigants</u> : Aluminum phosphide, Ethylene dibromide, Carbon tetrachloride, Methyl bromide |
| Mozzachio et al. [115] | Chlorothalonil exposure and cancer incidence among pesticide applicator participants in the Agricultural Health Study | 2008 | Cohort (AHS)       | Cancer        | Cancer registry files in Iowa and North Carolina | USA | ND | 1993-2004 | 47,625 pesticide applicators (3,657 reported using Chlorothalonil) | Chlorothalonil and Dieldrin, Heptachlor, Ziram                                                                                                                                                                                                                                                                                                                                                                                                                                                                                                                                                                                                                                                                                                                   |
| Narayan et al. [116]   | Occupational pesticide use and Parkinson's disease in the Parkinson Environment Gene (PEG) Study                      | 2017 | Case-control study | Neurotoxicity | Diagnosed                                        | USA | ND | 2001-2011 | 360 cases (PD) and 827 controls                                    | ND                                                                                                                                                                                                                                                                                                                                                                                                                                                                                                                                                                                                                                                                                                                                                               |
| Pardo et al. [117]     | Pesticide exposure and risk of aggressive prostate cancer                                                             | 2020 | Cohort (AHS)       | Cancer        | Cancer registry files in Iowa and                | USA | ND | 1993-2015 | 20,923 male pesticide private                                      | 38 active substances:<br><u>Herbicides</u> : Amide (Acetochlor, Dimethenamid), Amide/Diphenyl ether                                                                                                                                                                                                                                                                                                                                                                                                                                                                                                                                                                                                                                                              |

|                   |                                                                                                |      |              |        |                                                  |     |                                  |           |                                                               |                                                                                                                                                                                                                                                                                                                                                                                                                                                                                                                                                                                                                                                                                                                                                                                                                                                                                                                                                                                                                                                                          |
|-------------------|------------------------------------------------------------------------------------------------|------|--------------|--------|--------------------------------------------------|-----|----------------------------------|-----------|---------------------------------------------------------------|--------------------------------------------------------------------------------------------------------------------------------------------------------------------------------------------------------------------------------------------------------------------------------------------------------------------------------------------------------------------------------------------------------------------------------------------------------------------------------------------------------------------------------------------------------------------------------------------------------------------------------------------------------------------------------------------------------------------------------------------------------------------------------------------------------------------------------------------------------------------------------------------------------------------------------------------------------------------------------------------------------------------------------------------------------------------------|
|                   | among private pesticide applicators                                                            |      |              |        | North Carolina                                   |     |                                  |           | applicators (883 incident aggressive prostate cancers)        | (Fomesafen), Amide/Triazolopyrimidine (Cloransulam-methyl, Flumetsulam), Benzoylcyclohexanedione (Mesotrione), Cyclohexene oxime (Clethodim, Sethoxydim), Diphenyl ether (Acifluorfen), Growth inhibitor/Gametocides (Maleic hydrazide), Imidazolinone (Imazaquin), Nitrile (Bromoxynil), Organophosphorous (Glufosinate-ammonium), Oxazole (Clomazone), Oxazole/Cyclopropylisoxazole (Isoxaflutole), Phenoxy (Fenoxaprop-p-ethyl, Fluazifop-butyl), Pyridine/Aromatic acid (Cloprralid, Picloram), Pyridine (Triclopyr ), Urea (Linuron, Nicosulfuron, Rimsulfuron, Thifensulfuron-methyl), other (Sodium bentazon)<br><u>Insecticides</u> : Carbamate (Methomyl), Organochlorine (Endosulfan), Organophosphorous (Acephate, Dimethoate, Disulfoton, Tebupirimfos), Pyrethroid (Cyfluthrin, Lambda-cyhalothrin, Tefluthrin), Others (Chloropicrin, Bacillus thuringiensis)<br><u>Nematicides</u> : Fumigant (1, 3-dichloropropene)<br><u>Other</u> : Arsenical pesticides (lead arsenate (insecticide), organic arsenic (herbicide), and inorganic arsenic (herbicide)) |
| Park et al. [118] | Cancer incidence among paraquat-exposed pesticide applicators in the Agricultural Health Study | 2009 | Cohort (AHS) | Cancer | Cancer registry files in Iowa and North Carolina | USA | Only analysis of Corn production | 1993-2004 | 56,222 pesticide applicators (11,256 reported using Paraquat) | Paraquat and Metribuzin, Pendimethalin, 2,4,5-TP, Butylate, Dieldrin                                                                                                                                                                                                                                                                                                                                                                                                                                                                                                                                                                                                                                                                                                                                                                                                                                                                                                                                                                                                     |

|                   |                                                                                                                   |      |                      |                                |                                                                                      |        |                                          |           |                                                                                                               |                                                                                                                                                                                                                                                              |
|-------------------|-------------------------------------------------------------------------------------------------------------------|------|----------------------|--------------------------------|--------------------------------------------------------------------------------------|--------|------------------------------------------|-----------|---------------------------------------------------------------------------------------------------------------|--------------------------------------------------------------------------------------------------------------------------------------------------------------------------------------------------------------------------------------------------------------|
| Park et al. [119] | Exposure to pesticides and the prevalence of diabetes in a rural population in Korea                              | 2019 | Korea Farmers Cohort | Endocrine disruption (Diabete) | Questionnaires in a face-to-face interview, clinical examination, and blood sampling | Korea  | ND                                       | 2005-2008 | 2,559 farmers and farm managers (1,048 males and 1,511 females)                                               | ND                                                                                                                                                                                                                                                           |
| Piel et al. [64]  | Central nervous system tumors and agricultural exposures in the prospective cohort AGRICAN                        | 2017 | Cohort (AGRICAN)     | Cancer                         | Cancer registries                                                                    | France | 13 types of crops + 5 types of livestock | 2005-2011 | 170,858 women and men active and retired in agriculture-related activities (273 incident cases of CNS tumors) | ND                                                                                                                                                                                                                                                           |
| Piel et al. [120] | Increased risk of central nervous system tumours with carbamate insecticide use in the prospective cohort AGRICAN | 2019 | Cohort (AGRICAN)     | Cancer                         | Cancer registries                                                                    | France | 13 types of crops + 5 types of livestock | 2005-2013 | 170,858 women and men active and retired in agriculture-related activities (381 incident cases of CNS tumors) | 19 carbamates insecticides (aldicarb, bendiocarb, benfuracarb, carbaryl, carbofuran, carbosulfan, dimetilan, dioxacarb, ethiofen-carb, fenoxycarb, formetanate, furathiocarb, isolan, methiocarb, methomyl, pirimicarb, promecarb, thiodicarb and thiofanox) |
| Piel et al. [121] | Agricultural exposures to carbamate herbicides and fungicides and central nervous system tumour incidence in      | 2019 | Cohort (AGRICAN)     | Cancer                         | Cancer registries                                                                    | France | 13 types of crops + 5 types of livestock | 2005-2013 | 170,858 women and men active and retired in agriculture-related activities                                    | 7 carbamate herbicides (asulam, barban, chlorbufam, chlorpropham, desmedipham, phenmedipham, propham)<br>7 thiocarbamate herbicides (butylate, cycloate, diallate, EPTC, prosulfocarb, trial-late, vernolate)<br>3 carbamate fungicides (diethofencarb,      |

|                      |                                                                                                            |      |                   |               |                                                  |        |                                                                                                                                                                                                                                 |           |                                                                                               |                                                                                                                                                                                                                           |
|----------------------|------------------------------------------------------------------------------------------------------------|------|-------------------|---------------|--------------------------------------------------|--------|---------------------------------------------------------------------------------------------------------------------------------------------------------------------------------------------------------------------------------|-----------|-----------------------------------------------------------------------------------------------|---------------------------------------------------------------------------------------------------------------------------------------------------------------------------------------------------------------------------|
|                      | the cohort AGRI-CAN                                                                                        |      |                   |               |                                                  |        |                                                                                                                                                                                                                                 |           | (381 incident cases of CNS tumors)                                                            | iprovalicarb, propamocarb)<br>11 dithiocarbamate fungicides (cupreb, cuprobam, ferbam, mancopper, mancozeb, maneb, metiram, propineb, thiram, zineb, ziram)                                                               |
| Pouchieu et al. [65] | Pesticide use in agriculture and Parkinson's disease in the AGRICAN cohort study                           | 2018 | Cohort (AGRI-CAN) | Neurotoxicity | Self-reported Parkinson's disease (PD)           | France | 13 crops (grassland, wheat and/or barley, vineyards, corn, potatoes, fruit-growing, beets, rape, peas, sunflower, tobacco, vegetables, and greenhouses), 5 types of livestock (cattle, poultry, swine, horses, and sheep/goats) | 2005-2007 | 149,810 men active and retired in agriculture-related activities (1,732 incident cases of PD) | Dithiocarbamate <u>fungicides</u> (cupreb, ferbam, cuprobam, mancopper, mancozeb, maneb, metiram, propineb, thiram, zineb and ziram)<br>Bipyridyle <u>herbicides</u> (diquat and paraquat)<br><u>Insecticide</u> rotenone |
| Purdue et al. [122]  | Occupational exposure to organochlorine insecticides and cancer incidence in the Agricultural Health Study | 2007 | Cohort (AHS)      | Cancer        | Cancer registry files in Iowa and North Carolina | USA    | ND                                                                                                                                                                                                                              | 1993-2002 | 51,011 pesticide applicators (24,384 reported ever using organochlorine insecticides)         | 7 organochlorine insecticides (Aldrin, Chlordane, DDT, Dieldrin, Heptachlor, Lindane, Toxaphene)                                                                                                                          |

|                       |                                                                                                                                            |      |                  |        |                                                  |        |                                                         |           |                                                                                                                                                        |                                                                                                                                |
|-----------------------|--------------------------------------------------------------------------------------------------------------------------------------------|------|------------------|--------|--------------------------------------------------|--------|---------------------------------------------------------|-----------|--------------------------------------------------------------------------------------------------------------------------------------------------------|--------------------------------------------------------------------------------------------------------------------------------|
| Renier et al. [123]   | Agricultural exposure and risk of soft tissue sarcomas and gastrointestinal stromal sarcoma in the AGRICULTURE and CANCER (AGRICAN) cohort | 2022 | Cohort (AGRICAN) | Cancer | Cancer registries                                | France | 14 types of crops + 5 types of livestock                | 2005-2015 | 148,036 women (n=65,328) and men (n=82,708) active and retired in agriculture-related activities (188 incident cases of sarcoma: 74 women and 114 men) | 3 phenoxyherbicides (i.e., 2,4-D; 2,4,5-T and MCPA) and pentachlorophenol                                                      |
| Rusiecki et al. [124] | Cancer incidence among pesticide applicators exposed to Atrazine in the Agricultural Health Study                                          | 2004 | Cohort (AHS)     | Cancer | Cancer registry files in Iowa and North Carolina | USA    | Only analysis of Corn production                        | 1993-2001 | 53,943 pesticide applicators (52,740 males)                                                                                                            | Atrazine and Dicamba, Cyanazine, Alachlor, 2,4-D, Chlorimuronethyl, Metribuzin, Butylate, Phorate, Heptachlor                  |
| Rusiecki et al. [125] | Cancer incidence among pesticide applicators exposed to metolachlor in the Agricultural Health Study                                       | 2006 | Cohort (AHS)     | Cancer | Cancer registry files in Iowa and North Carolina | USA    | Only analysis of Corn, Sorghum, and Soybean productions | 1993-2002 | 50,193 pesticide applicators (males and females)                                                                                                       | Metolachlor and Cyanazine, EPTC, Alachlor, Imazethapyr, Trifluralin                                                            |
| Rusiecki et al. [126] | Cancer incidence among pesticide applicators exposed to Permethrin in the Agricultural Health Study                                        | 2009 | Cohort (AHS)     | Cancer | Cancer registry files in Iowa and North Carolina | USA    | ND                                                      | 1993-2004 | 49,093 pesticide applicators (11,623 reported using Permethrin) (2,907                                                                                 | Permethrin and Trichlorfon, Ziram, Coumaphos, Aldicarb, Chlorothalonil, Dichlorvos, Cyanazine, Metolachlor, Atrazine, Alachlor |

|                       |                                                                                                  |      |              |                                |                                                  |     |                                                     |           |                                                                                                          |                                                                                                                                                                                                                                                                                                                                                                                                                                                                                                                                                                                                                                                                                                                                                                                                                                                                                                                       |
|-----------------------|--------------------------------------------------------------------------------------------------|------|--------------|--------------------------------|--------------------------------------------------|-----|-----------------------------------------------------|-----------|----------------------------------------------------------------------------------------------------------|-----------------------------------------------------------------------------------------------------------------------------------------------------------------------------------------------------------------------------------------------------------------------------------------------------------------------------------------------------------------------------------------------------------------------------------------------------------------------------------------------------------------------------------------------------------------------------------------------------------------------------------------------------------------------------------------------------------------------------------------------------------------------------------------------------------------------------------------------------------------------------------------------------------------------|
|                       |                                                                                                  |      |              |                                |                                                  |     |                                                     |           | incident cancer cases)                                                                                   |                                                                                                                                                                                                                                                                                                                                                                                                                                                                                                                                                                                                                                                                                                                                                                                                                                                                                                                       |
| Samanic et al. [127]  | Cancer incidence among pesticide applicators exposed to Dicamba in the Agricultural Health Study | 2006 | Cohort (AHS) | Cancer                         | Cancer registry files in Iowa and North Carolina | USA | Only analysis of Soybean and field Corn productions | 1993-2002 | 41,969 applicators (22,036 reported ever using Dicamba)                                                  | Dicamba and 2,4-D, Atrazine, Glyphosate                                                                                                                                                                                                                                                                                                                                                                                                                                                                                                                                                                                                                                                                                                                                                                                                                                                                               |
| Shrestha et al. [128] | Pesticide use and incident Parkinson's disease in a cohort of farmers and their spouses          | 2020 | Cohort (AHS) | Neurotoxicity                  | Self-reported questionnaire                      | USA | ND                                                  | 1993-2016 | 38,274 applicators and 27,836 spouses (373 applicators and 118 spouses reported new Parkinson's disease) | 48 active ingredients:<br><u>Herbicides</u> : Benzoic (Dicamba), Chloroacetanilide (Alachlor, Metolachlor), Dinitroaniline (Pendimethalin, Trifluralin), Imidazolinone (Imazethypyr), Phenoxy (2,4-D, 2,4,5-T, 2,4,5-TP), Phosphinic (Glyphosate), Thiocarbamate (Butylate, EPTC), Triazine (Atrazine, Cyanazine, Metribuzin), Urea (Chlorimuron-ethyl), other herbicides (Paraquat, Petroleum oil)<br><u>Insecticides</u> : Carbamate (Aldicarb, Carbaryl, Carbofuran), Organochlorine (Aldrin, Chlordane, Dieldrin, DDT, Lindane, Heptachlor, Toxaphene), Organophosphate (Chlorpyrifos, Coumaphos, Diazinon, Dichlorvos, Fonofos, Malathion, Parathion, Phorate, Terbufos), Pyrethroid (Permethrin crops and animals)<br><u>Fungicides</u> : Benomyl, Captan, Chlorothalonil, Maneb, Metalaxyl<br><u>Fumigants</u> : Aluminum phosphide, Ethylene dibromide, Carbon disulfide/Carbon tetrachloride, Methyl bromide |
| Shrestha et al. [129] | Pesticide use and incident hypothyroidism in pesticide applicators in                            | 2018 | Cohort (AHS) | Endocrine disruption (Thyroid) | Self-reported questionnaire and telephone        | USA | ND                                                  | 1993-2016 | 34,879 applicators (34,125 males and 754 females)                                                        | 48 active ingredients:<br><u>Herbicides</u> : Benzoic (Dicamba), Chloroacetanilide (Alachlor, Metolachlor), Dinitroaniline (Pendimethalin, Trifluralin),                                                                                                                                                                                                                                                                                                                                                                                                                                                                                                                                                                                                                                                                                                                                                              |

|                     |                                                                                                                                            |      |              |               |                                                  |     |    |           |                                                                                           |                                                                                                                                                                                                                                                                                                                                                                                                                                                                                                                                                                                                                                                                                                                                                                                       |
|---------------------|--------------------------------------------------------------------------------------------------------------------------------------------|------|--------------|---------------|--------------------------------------------------|-----|----|-----------|-------------------------------------------------------------------------------------------|---------------------------------------------------------------------------------------------------------------------------------------------------------------------------------------------------------------------------------------------------------------------------------------------------------------------------------------------------------------------------------------------------------------------------------------------------------------------------------------------------------------------------------------------------------------------------------------------------------------------------------------------------------------------------------------------------------------------------------------------------------------------------------------|
|                     | the Agricultural Health Study                                                                                                              |      |              |               | interviews for follow-up                         |     |    |           |                                                                                           | <p>Imidazolinone (Imazethypyr), Phenoxy (2,4-D, 2,4,5-T, 2,4,5-TP), Phosphinic (Glyphosate), Thiocarbamate (Butylate, EPTC), Triazine (Atrazine, Cyanazine, Metribuzin), Urea (Chlorimuron-ethyl), other herbicides (Paraquat, Petroleum oil)</p> <p><u>Insecticides:</u> Carbamate (Aldicarb, Carbaryl, Carbofuran), Organochlorine (Aldrin, Chlordane, DDT, Dieldrin, Heptachlor, Lindane, Toxaphene), Organophosphate (Chlorpyrifos, Coumaphos, Diazinon, Dichlorvos, Fonofos, Malathion, Parathion, Phorate, Terbufos), Pyrethroid (Permethrin crops and animals)</p> <p><u>Fungicides:</u> Benomyl, Captan, Chlorothalonil, Maneb/Mancozeb, Metalaxyl</p> <p><u>Fumigants:</u> Aluminum phosphide, Carbon disulfide/Carbon tetrachloride, Ethylene dibromide, Methyl bromide</p> |
| Silver et al. [130] | Cancer incidence and Metolachlor use in the Agricultural Health Study: An update                                                           | 2015 | Cohort (AHS) | Cancer        | Cancer registry files in Iowa and North Carolina | USA | ND | 1993-2011 | 49,616 pesticide applicators (26,505 reported using Metolachlor) (5,701 incident cancers) | Metolachlor and Atrazine, Alachlor, Imazethapyr, Trifluralin, Dicamba                                                                                                                                                                                                                                                                                                                                                                                                                                                                                                                                                                                                                                                                                                                 |
| Starks et al. [131] | Peripheral Nervous System Function and Organophosphate Pesticide Use among Licensed Pesticide Applicators in the Agricultural Health Study | 2012 | Cohort (AHS) | Neurotoxicity | Neurological testing                             | USA | ND | 1993-1997 | 701 male applicators                                                                      | <p><u>Insecticides:</u></p> <p>Organophosphates (Acephate, Chlorpyrifos, Coumaphos, Diazinon, Dichlorvos, Dimethoate, Disulfoton, Ethoprop, Fonofos, Malathion, Parathion, Phorate, Phosmet, Tebupirimfos, Terbufos, Tetrachlorvinphos)</p> <p>Carbamates (Aldicarb, Benomyl, Carbaryl,</p>                                                                                                                                                                                                                                                                                                                                                                                                                                                                                           |

|                       |                                                                                             |      |                  |                                |                                                                                                  |        |                                          |           |                                                                                                                              |                                                                                                                                                                                                                                                                                                                                                                                                                                                                                                                                                                                                                                                                                                                                                                                                                                                                                                                     |
|-----------------------|---------------------------------------------------------------------------------------------|------|------------------|--------------------------------|--------------------------------------------------------------------------------------------------|--------|------------------------------------------|-----------|------------------------------------------------------------------------------------------------------------------------------|---------------------------------------------------------------------------------------------------------------------------------------------------------------------------------------------------------------------------------------------------------------------------------------------------------------------------------------------------------------------------------------------------------------------------------------------------------------------------------------------------------------------------------------------------------------------------------------------------------------------------------------------------------------------------------------------------------------------------------------------------------------------------------------------------------------------------------------------------------------------------------------------------------------------|
|                       |                                                                                             |      |                  |                                |                                                                                                  |        |                                          |           |                                                                                                                              | Carbofuran)<br>HPEEs                                                                                                                                                                                                                                                                                                                                                                                                                                                                                                                                                                                                                                                                                                                                                                                                                                                                                                |
| Starling et al. [132] | Pesticide use and incident diabetes among wives of farmers in the Agricultural Health Study | 2014 | Cohort (AHS)     | Endocrine disruption (Diabete) | self-administrated questionnaires or telephone interviews and telephone interviews for follow-up | USA    | ND                                       | 1993-1997 | 13,637 farmers' wives who reported ever personally mixing or applying pesticides at enrollment applicators and their spouses | <p>45 active ingredients:</p> <p><u>Herbicides:</u> Benzoic (Dicamba), Chloroacetanilide (Alachlor, Metolachlor), Dinitroaniline (Pendimethalin, Trifluralin), Imidazolinone (Imazethypyr), Phenoxy (2,4-D, 2,4,5-T, 2,4,5-TP), Phosphinic (Glyphosate), Thiocarbamate (Butylate, EPTC), Triazine (Atrazine, Cyanazine, Metribuzin), Urea (Chlorimuron-ethyl), other herbicides (Paraquat, Petroleum oil)</p> <p><u>Insecticides:</u> Carbamate (Aldicarb, Carbaryl, Carbofuran), Organochlorine (Aldrin, Chlordane, DDT, Dieldrin, Heptachlor, Lindane, Toxaphene), Oganophosphate (Chlorpyrifos, Coumaphos, Diazinon, Dichlorvos, Fonofos, Malathion, Parathion, Phorate, Terbufos), Pyrethroid (Permethrin crops and animals)</p> <p><u>Fungicides:</u> Benomyl, Captan, Chlorothalonil, Maneb, Metalaxyl</p> <p><u>Fumigants:</u> Carbon disulfide/Carbon tetrachloride, Ethylene dibromide, Methyl bromide</p> |
| Talibov et al. [133]  | Colorectal cancer among farmers in the AGRICAN cohort study                                 | 2022 | Cohort (AGRICAN) | Cancer                         | Cancer registries                                                                                | France | 13 types of crops + 5 types of livestock | 2005-2015 | 2609 cases of colorectal cancer                                                                                              | <p>Insecticides use on livestock</p> <p>Insecticide treatment in horse farming</p> <p>Pesticide treatment in sunflower, fruit growing, tobacco</p>                                                                                                                                                                                                                                                                                                                                                                                                                                                                                                                                                                                                                                                                                                                                                                  |
| Tual et al. [134]     | Occupational exposure to pesticides and multiple myeloma in the AGRICAN cohort              | 2019 | Cohort (AGRICAN) | Cancer                         | Cancer registries                                                                                | France | 13 types of crops + 5 types of livestock | 2005-2013 | 155,192 women and men active and retired in agriculture-related                                                              | <p>Insecticides use on animals (DDT, lindane, carbaryl, carbaryl, permethrin, coumaphos)</p> <p>Disinfectants in barns (quaternary ammonium, phenol derivatives, aldehydes including formaldehyde)</p>                                                                                                                                                                                                                                                                                                                                                                                                                                                                                                                                                                                                                                                                                                              |

|                         |                                                                                                                                                          |      |              |        |                                                  |     |                                        |           |                                                                                      |                                                                                    |
|-------------------------|----------------------------------------------------------------------------------------------------------------------------------------------------------|------|--------------|--------|--------------------------------------------------|-----|----------------------------------------|-----------|--------------------------------------------------------------------------------------|------------------------------------------------------------------------------------|
|                         |                                                                                                                                                          |      |              |        |                                                  |     |                                        |           | activities<br>(269 incident cases of multiple myeloma)                               | Pesticides use on corn (DDT, lindane, carbaryl, 2-4-D, captan, atrazine, dinoterb) |
| van Bemmel et al. [135] | S-Ethyl-N,N-di-propylthiocarbamate exposure and cancer incidence among male pesticide applicators in the Agricultural Health Study: A prospective cohort | 2008 | Cohort (AHS) | Cancer | Cancer registry files in Iowa and North Carolina | USA | Only analysis of Field corn production | 1993-2004 | 48,378 pesticide applicators (9,878 reported using EPTC) (470 incident cancer cases) | EPTC                                                                               |

**Table S2.** Overall risk of bias assessment following the Joanna Briggs Institute (JBI) checklist for prevalence studies.

| Authors                   | Publication year | Q1* | Q2* | Q3* | Q4* | Q5* | Q6* | Q7* | Q8* | Q9* | Somme | Classification |
|---------------------------|------------------|-----|-----|-----|-----|-----|-----|-----|-----|-----|-------|----------------|
| Alavanja et al. [69]      | 2003             | 1   | 1   | 1   | 1   | 1   | 1   | 1   | 1   | 1   | 9     | low            |
| Alavanja et al. [70]      | 2004             | 1   | 1   | 1   | 0   | 0   | 1   | 1   | 1   | 0   | 6     | high           |
| Alavanja et al. [71]      | 2014             | 1   | 1   | 1   | 1   | 1   | 1   | 1   | 1   | 1   | 9     | low            |
| Andreotti et al. [72]     | 2009             | 1   | 1   | 1   | 0   | 1   | 1   | 1   | 1   | 0   | 7     | moderate       |
| Andreotti et al. [73]     | 2018             | 1   | 1   | 1   | 1   | 1   | 1   | 1   | 1   | 0   | 8     | moderate       |
| Andreotti et al. [16]     | 2020             | 1   | 1   | 1   | 0   | 1   | 1   | 1   | 1   | 1   | 8     | moderate       |
| Band et al. [74]          | 2011             | 1   | 1   | 0   | 1   | 1   | 1   | 1   | 1   | 1   | 8     | moderate       |
| Barry et al. [75]         | 2012             | 1   | 1   | 1   | 1   | 1   | 1   | 1   | 1   | 0   | 8     | moderate       |
| Beane Freeman et al. [76] | 2005             | 1   | 1   | 1   | 1   | 0   | 1   | 1   | 1   | 1   | 8     | moderate       |
| Bonner et al. [77]        | 2007             | 1   | 1   | 1   | 1   | 1   | 1   | 1   | 1   | 0   | 8     | moderate       |
| Bonner et al. [78]        | 2010             | 1   | 1   | 0   | 1   | 1   | 1   | 1   | 1   | 0   | 7     | moderate       |
| Bonner et al. [79]        | 2017             | 1   | 1   | 1   | 1   | 0   | 1   | 1   | 1   | 1   | 8     | moderate       |
| Boulanger et al. [62]     | 2017             | 1   | 1   | 1   | 1   | 1   | 1   | 0   | 1   | 0   | 7     | moderate       |
| Boulanger et al. [80]     | 2018             | 1   | 1   | 0   | 1   | 1   | 1   | 1   | 1   | 0   | 7     | moderate       |
| Chiu et al. [81]          | 2006             | 1   | 1   | 1   | 0   | 1   | 1   | 0   | 1   | 0   | 6     | high           |

|                         |      |   |   |   |   |   |   |   |   |   |   |          |
|-------------------------|------|---|---|---|---|---|---|---|---|---|---|----------|
| Christensen et al. [82] | 2010 | 1 | 1 | 1 | 1 | 1 | 1 | 1 | 1 | 0 | 8 | moderate |
| De Roos et al. [83]     | 2005 | 1 | 1 | 1 | 0 | 1 | 1 | 1 | 1 | 0 | 7 | moderate |
| Delancey et al. [84]    | 2009 | 1 | 1 | 1 | 1 | 1 | 1 | 1 | 1 | 0 | 8 | moderate |
| Dennis et al. [85]      | 2010 | 1 | 1 | 1 | 1 | 1 | 1 | 1 | 1 | 0 | 8 | moderate |
| Engel et al. [86]       | 2005 | 1 | 1 | 1 | 0 | 0 | 1 | 1 | 1 | 0 | 6 | high     |
| Goldner et al. [87]     | 2013 | 1 | 1 | 1 | 1 | 0 | 0 | 1 | 1 | 1 | 7 | moderate |
| Greenburg et al. [88]   | 2008 | 1 | 1 | 1 | 1 | 0 | 1 | 1 | 1 | 1 | 8 | moderate |
| Hofmann et al. [89]     | 2021 | 1 | 1 | 1 | 1 | 1 | 1 | 1 | 0 | 1 | 8 | moderate |
| Hou et al. [90]         | 2006 | 1 | 1 | 1 | 1 | 1 | 1 | 1 | 1 | 0 | 8 | moderate |
| Ji et al. [91]          | 2001 | 0 | 1 | 1 | 0 | 1 | 1 | 1 | 1 | 0 | 6 | high     |
| Jones et al. [92]       | 2015 | 1 | 1 | 1 | 1 | 1 | 1 | 0 | 1 | 0 | 7 | moderate |
| Kamel et al. [93]       | 2007 | 1 | 1 | 1 | 0 | 0 | 0 | 0 | 1 | 0 | 4 | high     |
| Kang et al. [94]        | 2008 | 1 | 1 | 1 | 1 | 0 | 1 | 1 | 1 | 0 | 7 | moderate |
| Koutros et al. [95]     | 2008 | 1 | 1 | 1 | 1 | 0 | 1 | 1 | 1 | 0 | 7 | moderate |
| Koutros et al. [96]     | 2009 | 1 | 1 | 1 | 1 | 1 | 1 | 1 | 1 | 0 | 8 | moderate |
| Koutros et al. [98]     | 2016 | 1 | 1 | 1 | 0 | 1 | 1 | 1 | 1 | 1 | 8 | moderate |
| Koutros et al. [97]     | 2013 | 1 | 1 | 1 | 1 | 1 | 1 | 1 | 1 | 0 | 8 | moderate |
| Lee et al. [99]         | 2004 | 1 | 1 | 1 | 1 | 1 | 1 | 1 | 1 | 0 | 8 | moderate |



|                          |      |   |   |   |   |   |   |   |   |   |   |          |
|--------------------------|------|---|---|---|---|---|---|---|---|---|---|----------|
| Narayan et al.<br>[116]  | 2017 | 1 | 1 | 0 | 0 | 1 | 0 | 1 | 1 | 0 | 5 | high     |
| Pardo et al.<br>[117]    | 2020 | 1 | 1 | 1 | 0 | 1 | 1 | 1 | 1 | 1 | 8 | moderate |
| Park et al.<br>[118]     | 2009 | 1 | 1 | 0 | 1 | 0 | 1 | 1 | 1 | 0 | 6 | high     |
| Park et al.<br>[119]     | 2019 | 1 | 1 | 0 | 1 | 1 | 0 | 0 | 0 | 0 | 4 | high     |
| Piel et al. [64]         | 2017 | 1 | 1 | 0 | 1 | 1 | 1 | 1 | 1 | 0 | 7 | moderate |
| Piel et al.<br>[120]     | 2019 | 1 | 1 | 1 | 1 | 1 | 1 | 1 | 1 | 0 | 8 | moderate |
| Piel et al.<br>[121]     | 2019 | 1 | 1 | 0 | 1 | 1 | 1 | 1 | 1 | 1 | 8 | moderate |
| Pouchieu et<br>al. [65]  | 2018 | 1 | 1 | 0 | 1 | 1 | 1 | 0 | 1 | 0 | 6 | high     |
| Purdue et al.<br>[122]   | 2007 | 1 | 1 | 1 | 1 | 0 | 1 | 1 | 1 | 0 | 7 | moderate |
| Renier et al.<br>[123]   | 2022 | 1 | 1 | 1 | 1 | 1 | 1 | 0 | 1 | 1 | 8 | moderate |
| Rusiecki et al.<br>[124] | 2004 | 1 | 1 | 1 | 1 | 1 | 1 | 1 | 1 | 1 | 9 | low      |
| Rusiecki et al.<br>[125] | 2006 | 1 | 1 | 1 | 1 | 1 | 1 | 1 | 1 | 1 | 9 | low      |
| Rusiecki et al.<br>[126] | 2009 | 1 | 1 | 1 | 1 | 0 | 1 | 1 | 1 | 0 | 7 | moderate |
| Samanic et al.<br>[127]  | 2006 | 1 | 1 | 1 | 1 | 0 | 1 | 1 | 1 | 1 | 8 | moderate |
| Shrestha et al.<br>[128] | 2020 | 1 | 1 | 1 | 0 | 1 | 0 | 1 | 1 | 0 | 6 | high     |
| Shrestha et al.<br>[129] | 2018 | 1 | 1 | 1 | 1 | 1 | 0 | 1 | 1 | 0 | 7 | moderate |
| Silver et al.<br>[130]   | 2015 | 1 | 1 | 1 | 1 | 0 | 1 | 1 | 1 | 1 | 8 | moderate |

---

|                           |      |   |   |   |   |   |   |   |   |   |   |          |
|---------------------------|------|---|---|---|---|---|---|---|---|---|---|----------|
| Starks et al.<br>[131]    | 2012 | 1 | 1 | 1 | 1 | 0 | 1 | 1 | 1 | 0 | 7 | moderate |
| Starling et al.<br>[132]  | 2014 | 1 | 1 | 1 | 1 | 0 | 0 | 0 | 1 | 0 | 5 | high     |
| Talibov et al.<br>[133]   | 2022 | 1 | 1 | 1 | 1 | 1 | 1 | 0 | 1 | 1 | 8 | moderate |
| Tual et al.<br>[134]      | 2019 | 1 | 1 | 0 | 1 | 1 | 1 | 1 | 1 | 1 | 8 | moderate |
| van Bemmelen et al. [135] | 2008 | 1 | 1 | 1 | 1 | 0 | 1 | 1 | 1 | 0 | 7 | moderate |

---

\*Q1. Was the sample frame appropriate to address the target population?

Q2. Were study participants sampled in an appropriate way?

Q3. Was the sample size adequate?

Q4. Were the study subjects and the setting described in detail?

Q5. Was the data analysis conducted with sufficient coverage of the identified sample?

Q6. Were valid methods used for the identification of the condition?

Q7. Was the condition measured in a standard, reliable way for all participants?

Q8. Was there appropriate statistical analysis?

Q9. Was the response rate adequate, and if not was the low response rate managed appropriately?
